# Supplementary material for: Higher neutrophil-to-lymphocyte ratio after the first cycle of the first-line chemotherapy is associated with poor cancer specific survival of upper urinary tract carcinoma patients
Source: PubMed Central journal article supplement — Transl Androl Urol. 2021 Jul;10(7):2838–47. doi: 10.21037/tau-21-185 (PMC8350230; doi:10.21037/tau-21-185), 2021-07
Supplement: tau-10-07-2838-dss.pdf [file tau-10-07-2838-dss.pdf]

## Data Sharing Statement

|                     |                                                                                                                                                    |                                                                                                     |
|---------------------|----------------------------------------------------------------------------------------------------------------------------------------------------|-----------------------------------------------------------------------------------------------------|
| <b>Article Info</b> | <a href="http://dx.doi.org/10.21037/tau-21-185">http://dx.doi.org/10.21037/tau-21-185</a>                                                          |                                                                                                     |
| <b>Item</b>         | <b>Question</b>                                                                                                                                    | <b>Authors' Response<br/>(place "-" if not applicable)</b>                                          |
| 1                   | Would you like to share data collected for your study to others?                                                                                   | No                                                                                                  |
| 2                   | If not, would you like to share the reason for your decision?                                                                                      | The institutional ethical review board did not agree with data sharing in this retrospective study. |
| 3                   | What data in particular will be shared?                                                                                                            |                                                                                                     |
| 4                   | Any other documents will be share? Such as study protocol, statistical analysis plan, informed consent form, clinical study report, analytic code. |                                                                                                     |
| 5                   | When will data availability begin?                                                                                                                 |                                                                                                     |
| 6                   | When will data availability end?                                                                                                                   |                                                                                                     |
| 7                   | To whom will you share the data?                                                                                                                   |                                                                                                     |
| 8                   | For what type of analysis or purpose?                                                                                                              |                                                                                                     |
| 9                   | How or where can the data/documents be obtained?                                                                                                   |                                                                                                     |
| 10                  | Any other restrictions?                                                                                                                            |                                                                                                     |
